# Supplementary material for: Mapping Maternal Health in the New Media Environment: A Scientometric Analysis
Source: MDPI journal article supplement (doi:10.3390/ijerph182413095), 2021-12-11
Supplement: s1 [file s1]

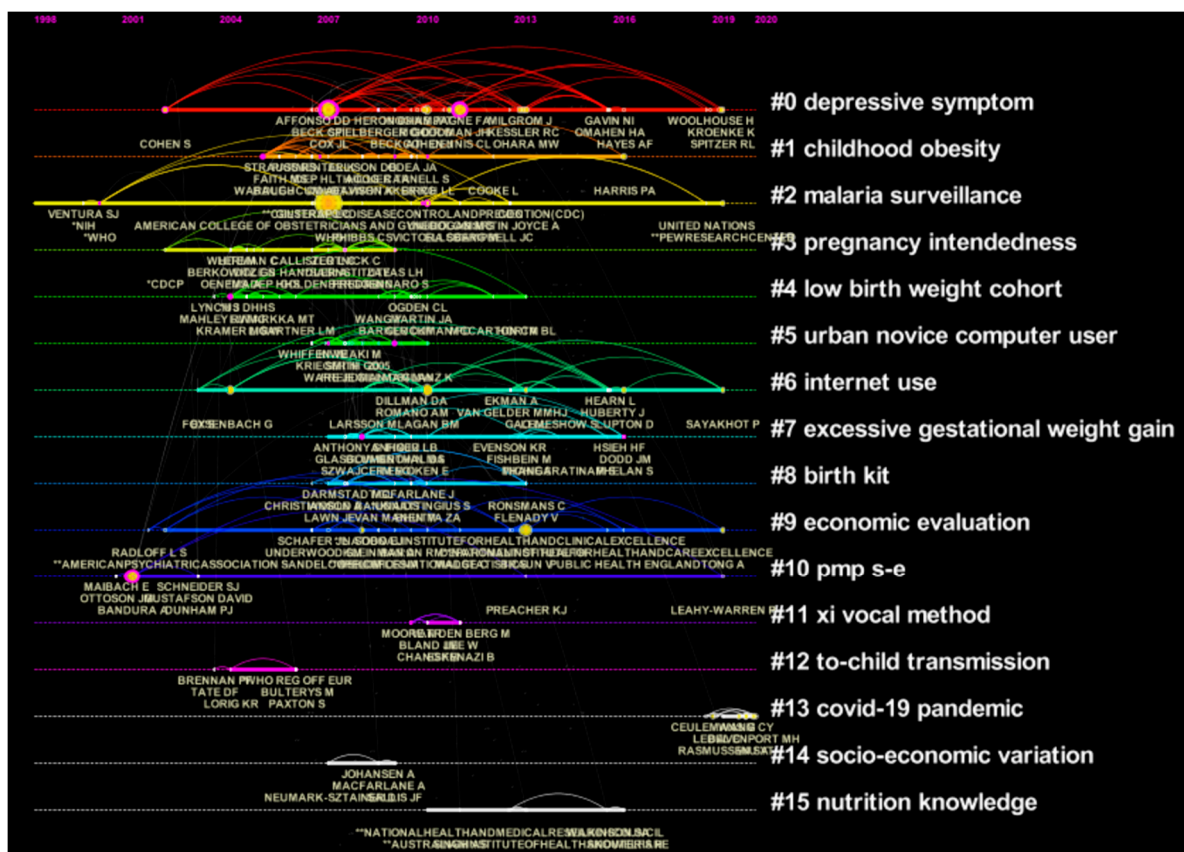

Figure S1: The time line of hotspot clustering.

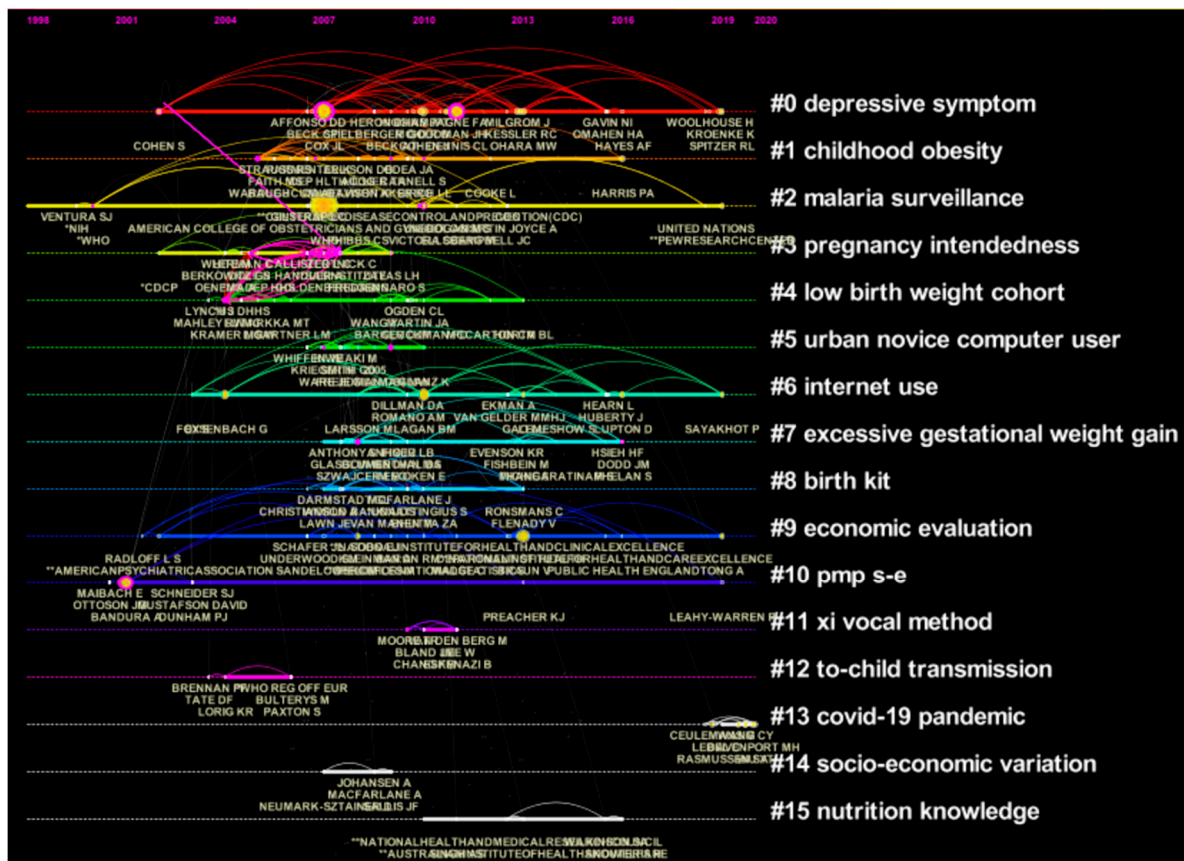

Figure S2: Structural variation arising from rep-representative literature on maternal mental health.

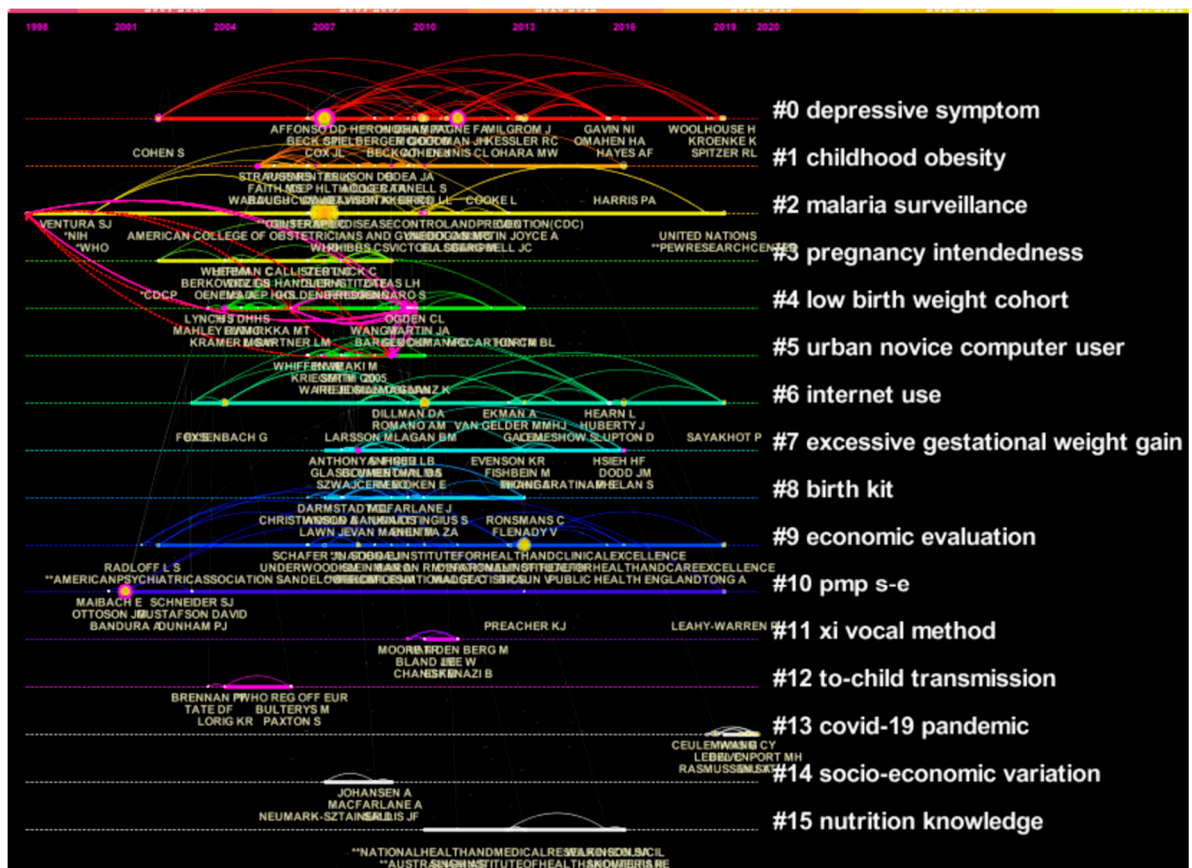

Figure S3: Structural variation arising from representative literature on maternal and neonatal nutrition.

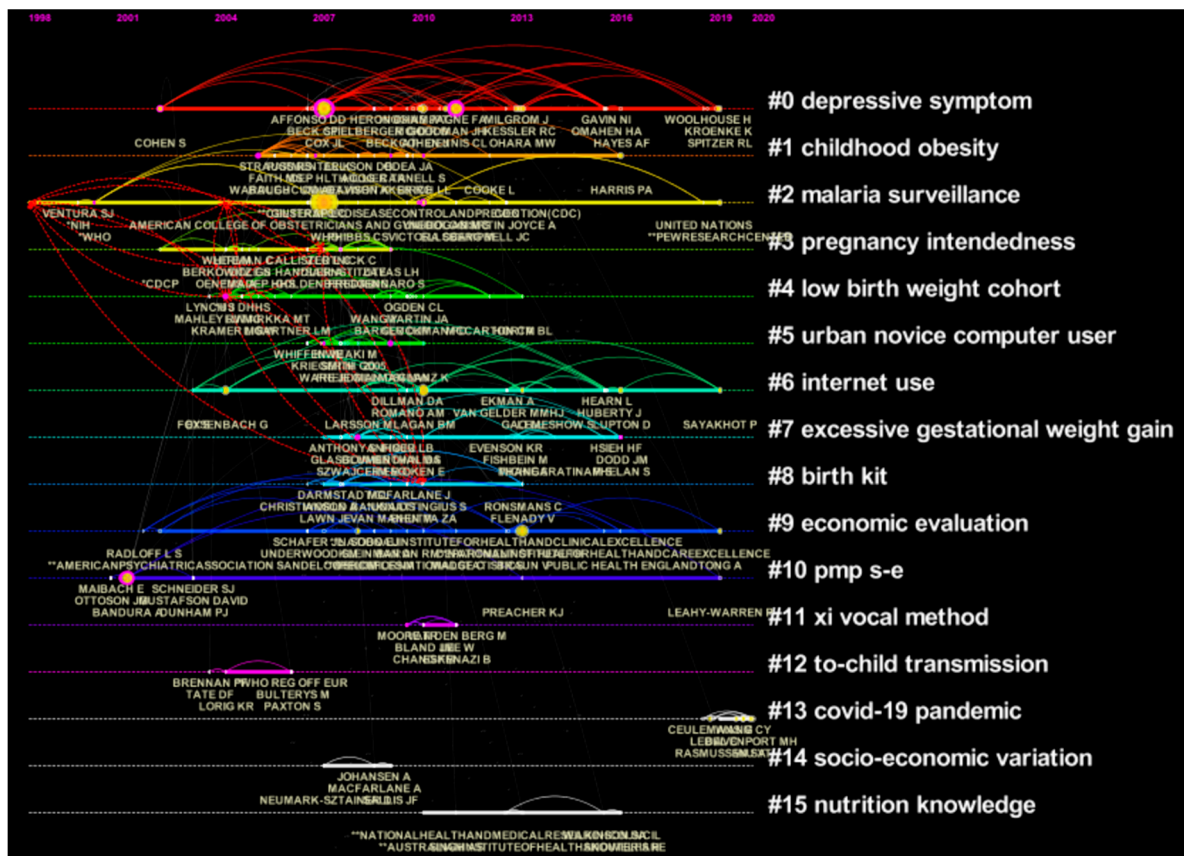

Figure S4: Structural variations arising from representative literature on reproductive technology and devices.
